# Supplementary material
Source: PubMed Central journal article supplement (PMC5063987)
Supplement: 10.1074_M116.743187_jbc.M116.743187-1.pdf [file 10.1074_M116.743187_jbc.M116.743187-1.pdf]

# Leptin Enhances TH2 and ILC2 Responses in Allergic Airway Disease

Handong Zheng<sup>1,#</sup>, Xing Zhang<sup>1,2,#</sup>, Eliseo F. Castillo<sup>1</sup>, Yan Luo<sup>2,3</sup>, Meilian Liu<sup>2,3,\*</sup>, and Xuexian O. Yang<sup>1,\*</sup>

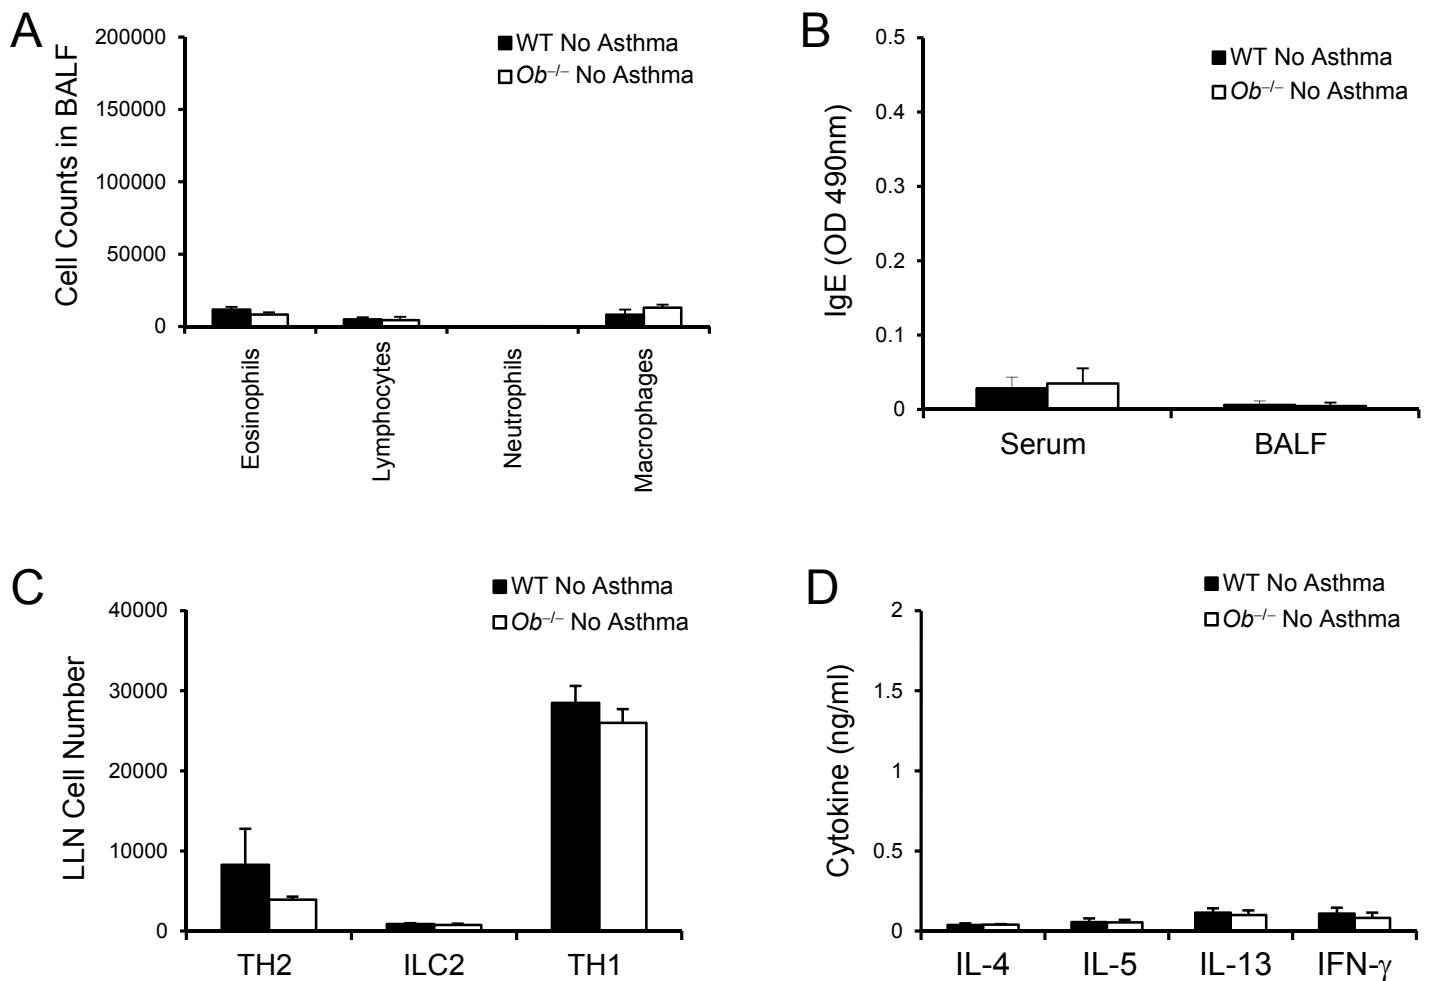

**Fig. S1. Characterization of mice without allergic asthma.** (A) Cellular profile of BALFs from unchallenged WT and *Ob*<sup>-/-</sup> mice. (B) ELISA of Ova-specific IgE in sera and BALFs. (C) Quantification of TH2 cells, ILC2s and TH1 cells in LLNs. (D) ELISA of cytokines in LLN cells after *ex vivo* recall with Ova (100  $\mu$ g/ml). Values are means and SD. Student's *t*-test. Data represent two experiments (*n* = 3-4 per group).

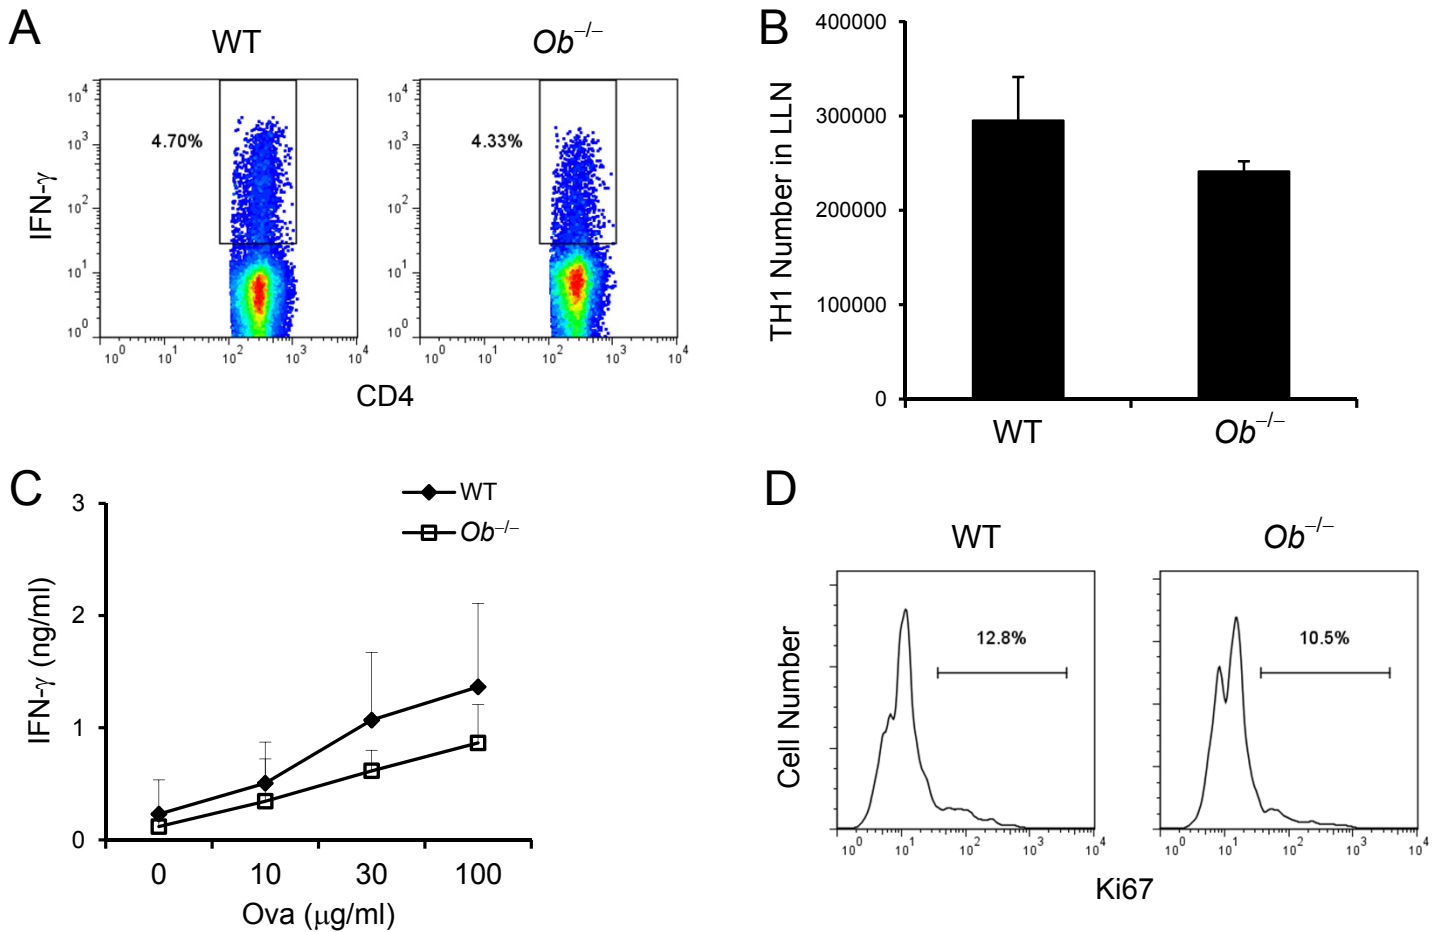

**Fig. S2. Leptin-deficiency has minimal effects on TH1 responses in allergic asthma.** (A) Intracellular stain of TH1 cells (LIN<sup>+</sup>CD4<sup>+</sup>IFN $\gamma$ <sup>+</sup>) in LLN cells from WT and  $Ob^{-/-}$  mice after induction of experimental asthma. (B) Quantification of TH1 cells in LLNs. (C) ELISA of IFN $\gamma$  expression by LLN cells after ex vivo recall with Ova at indicated concentrations. (D) Intracellular stain of Ki67 in LLN TH1 cells. (B, C) Values are means and SD. Student's *t*-test, no significance. Data represent two experiments (n = 5-6 per group).

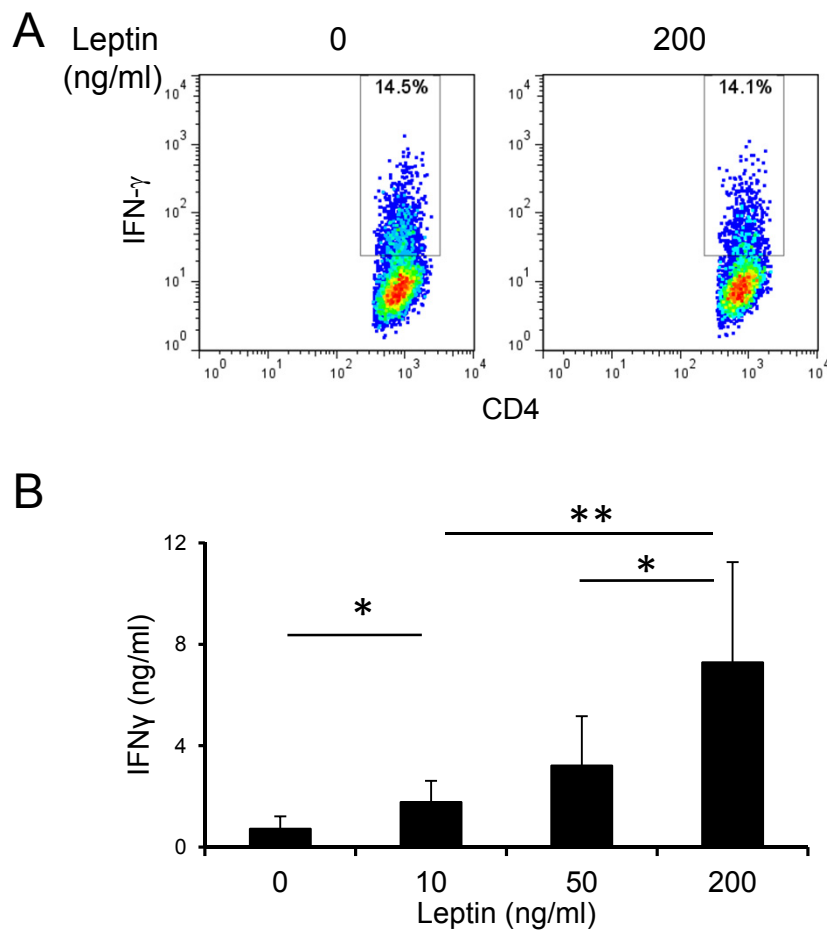

**Fig. S3. Leptin promotes TH1 cell responses *in vitro*.** (A) Intracellular stain of TH1 cells differentiated *in vitro* with or without leptin treatment. (B) ELISA of IFN $\gamma$  expression by TH1 cells re-stimulated overnight with plate-bound anti-CD3 in the presence of leptin at indicated concentrations. Values are means and SD (n = 4 in each group). Student's *t*-test, \*  $p \leq 0.05$  and \*\*  $p \leq 0.005$ . Data represent three experiments.

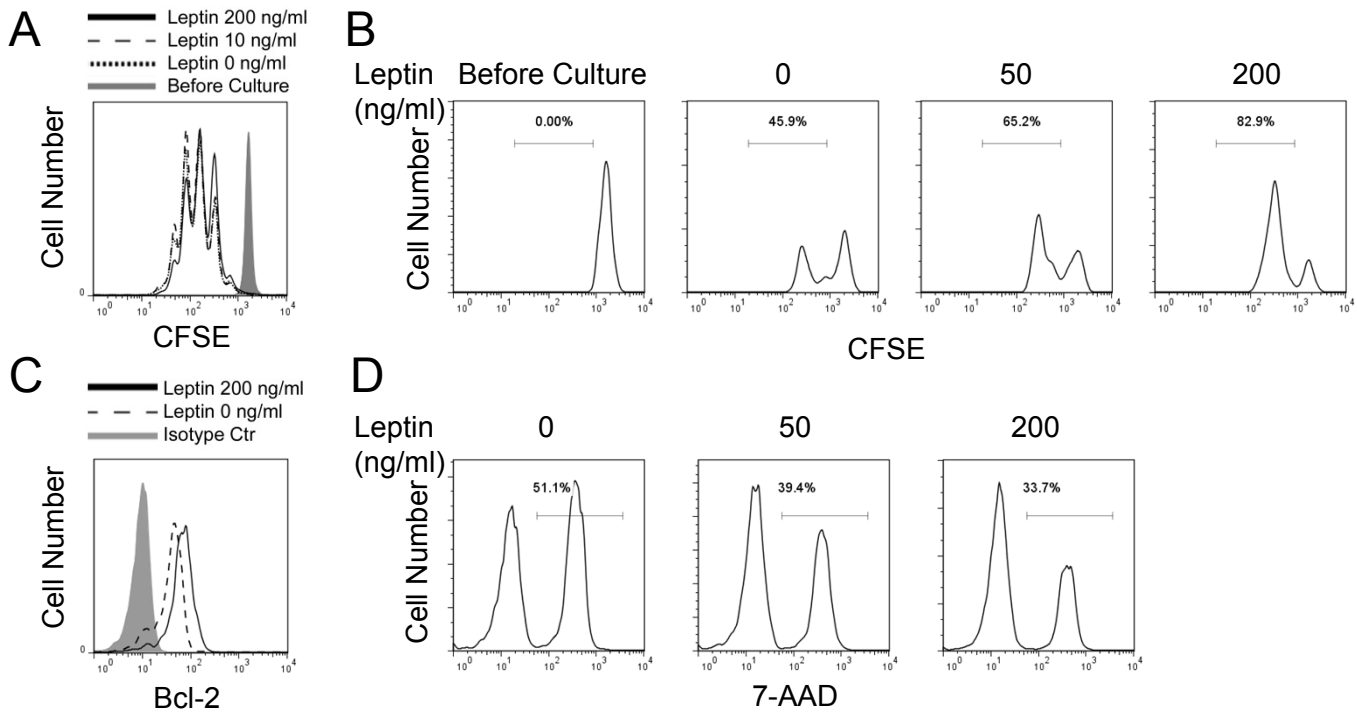

**Fig. S4. Leptin promotes proliferation of TH1 cells and protects TH1 cells from activation induced cell death.** (A-D) Cells were cultured in the absence or presence of leptin at indicated concentrations. (A) Flow cytometry of CFSE dilution in TH1 cells during *in vitro* differentiation. (B) Flow cytometry of CFSE dilution in TH1 cells during 1-day restimulation with plate-bound anti-CD3. (C) Intracellular stain of Bcl-2 in *in vitro* polarized TH1 cells. (D) Flow cytometry of activation induced cell death in TH1 cells after restimulation with plate-bound anti-CD3 for 24 h. Data represent three experiments.

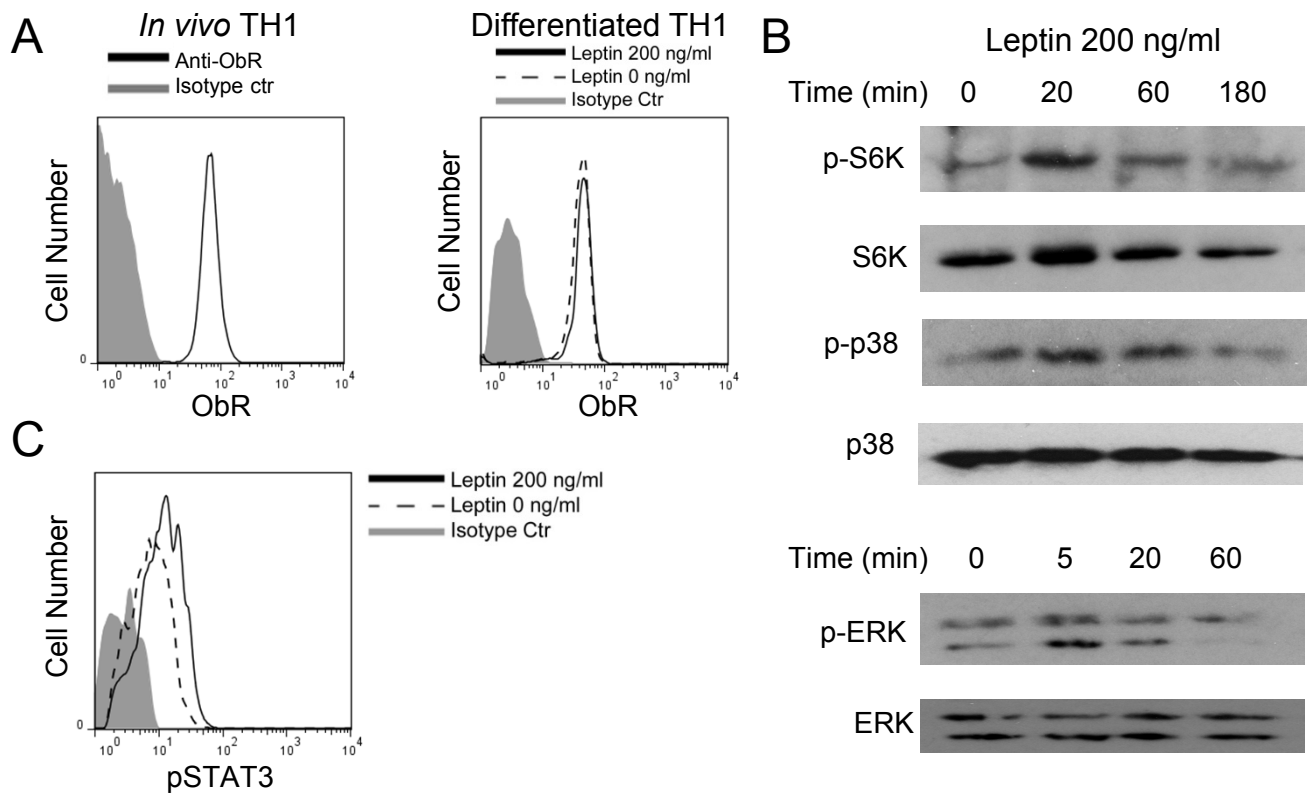

**Fig. S5. Leptin activates STAT3, MAPK and mTOR signal pathways through targeting leptin receptor (ObR) in TH1 cells.** (A) Flow cytometry of ObR expression on LLN TH1 cells generated in the asthmatic responses and on *in vitro* differentiated TH1 cells. (B) Immunoblot of phospho- and total S6K, p38 MAPK and ERK1/2 in TH1 cells generated *in vitro* treated with leptin for indicated times. (C) Intracellular stain of p-STAT3 in TH1 cells treated with leptin for 20 m. Data shown represent two experiments.
